# Supplementary material for: Hydrogen bonded polymer complex thin films for highly stretchable gas barriers
Source: Royal Society of Chemistry journal article supplement (doi:10.1039/d3lp00194f), 2024-01-01
Supplement: d3lp00194f1.pdf [file d3lp00194f1.pdf]

Supporting Information

**Hydrogen bonded polymer complex thin films  
for highly stretchable gas barrier**

*Sarah G. Fisher,<sup>a</sup> Hsu-Cheng Chiang,<sup>a</sup> Ethan T. Iverson,<sup>a</sup> Edward Chang,<sup>b</sup> Jaime C. Grunlan<sup>\*a,b,c</sup>*

<sup>a</sup>Department of Chemistry, Texas A&M University, College Station, TX 77843, USA

<sup>b</sup>Department of Mechanical Engineering, Texas A&M University, College Station, TX 77843, USA

<sup>c</sup>Department of Materials Science & Engineering, Texas A&M University, College Station, TX 77843, USA

\*Corresponding author: Jaime C. Grunlan (Email: [jgrunlan@tamu.edu](mailto:jgrunlan@tamu.edu))

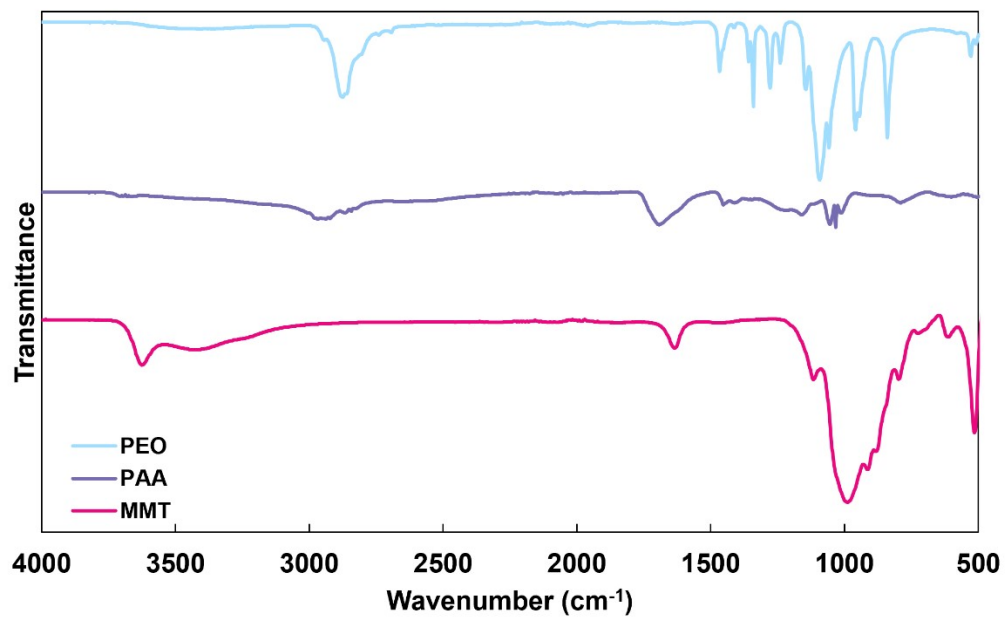

Fig. S1 FTIR spectra of PEO, PAA, and MMT.

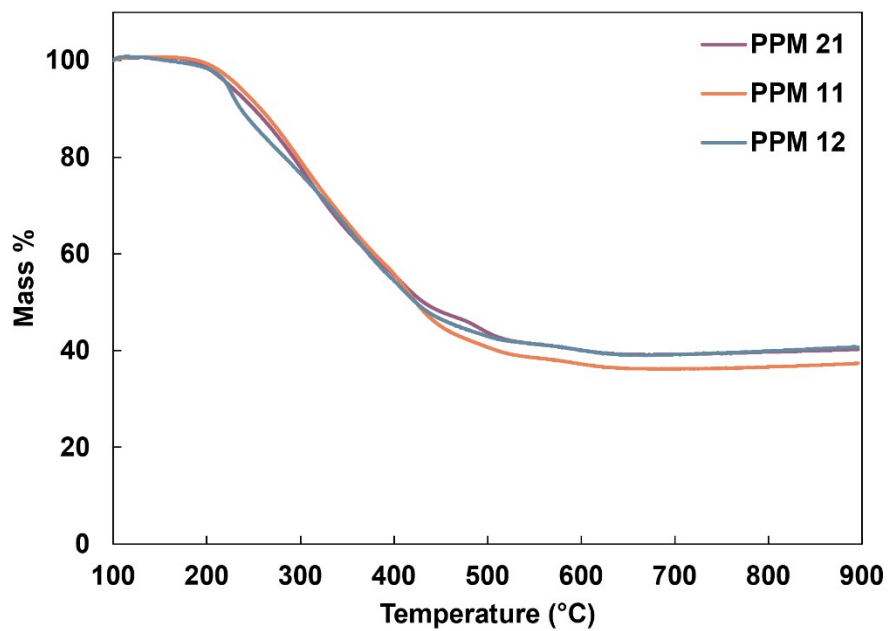

Fig. S2 TGA thermograms of HBPCs under air.

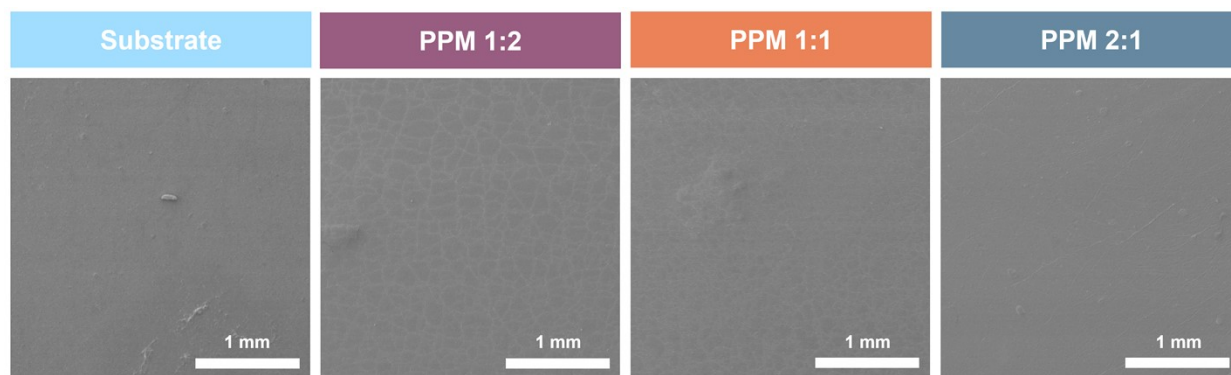

**Fig. S3** SEM images of uncoated and coated rubber with various HBPC recipes.

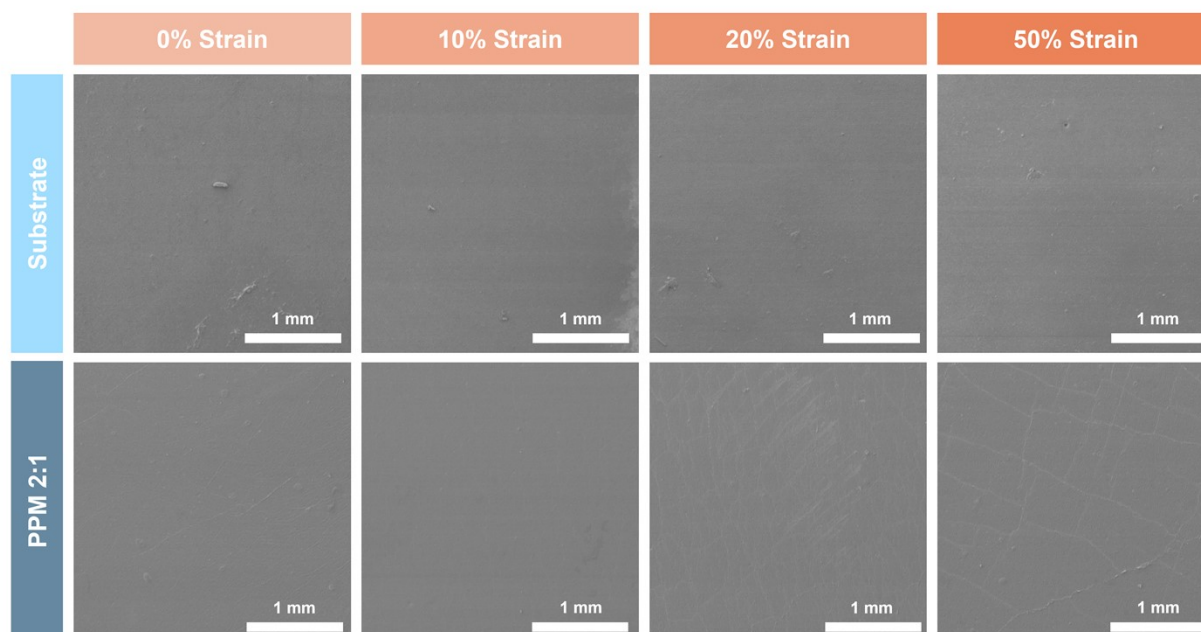

**Fig. S4** SEM images of uncoated rubber and rubber coated with PPM 2:1 after 0%, 10%, 20% and 50% strain.

**Table S1** Barrier properties of uncoated and coated natural rubber

| <b>Sample</b> | <b>Film Thickness<br/>(<math>\mu\text{m}</math>)</b> | <b>Coat Weight<br/>(<math>\text{g} / \text{m}^2</math>)</b> | <b>Strain<br/>(%)</b> | <b>OTR<br/>(<math>\text{cc} / (\text{m}^2 \cdot \text{day})</math>)</b> | <b>Film Permeability*<br/>(<math>\cdot 10^{-16} \text{cc cm} / (\text{cm}^2 \text{s Pa})</math>)</b> |
|---------------|------------------------------------------------------|-------------------------------------------------------------|-----------------------|-------------------------------------------------------------------------|------------------------------------------------------------------------------------------------------|
| Substrate     | —                                                    | —                                                           | 0                     | 2110                                                                    | —                                                                                                    |
|               |                                                      |                                                             | 10                    | 2030                                                                    | —                                                                                                    |
|               |                                                      |                                                             | 20                    | 2180                                                                    | —                                                                                                    |
|               |                                                      |                                                             | 50                    | 2100                                                                    | —                                                                                                    |
| PPM 1:2       | $1.07 \pm 0.01$                                      | $0.23 \pm 0.17$                                             | 0                     | 1150                                                                    | 61.8                                                                                                 |
| PPM 1:1       | $1.63 \pm 0.03$                                      | $1.52 \pm 0.29$                                             | 0                     | 262                                                                     | 11.2                                                                                                 |
| PPM 2:1       | $1.79 \pm 0.01$                                      | $1.75 \pm 0.66$                                             | 0                     | 21.4                                                                    | 0.9                                                                                                  |
|               |                                                      |                                                             | 10                    | 20.1                                                                    | 0.8                                                                                                  |
|               |                                                      |                                                             | 20                    | 40.4                                                                    | 1.7                                                                                                  |
|               |                                                      |                                                             | 50                    | 138                                                                     | 6.0                                                                                                  |

\*Film permeability was decoupled from the substrate using a previously described method.<sup>S1</sup>

## Reference

S1) A. P. Roberts, B. M. Henry, A. P. Sutton, C. R. M. Grovenor, G. A. D. Briggs, T. Miyamoto, M. Kano, Y. Tsukahara and M. Yanaka, *J. Membr. Sci.*, 2002, **208**, 75–88.
